# Supplementary material for: On the effects of induced polarizability at the water–graphene interface via classical charge-on-spring models
Source: Royal Society of Chemistry journal article supplement (doi:10.1039/d1cp05573a), 2022-01-01
Supplement: d1cp05573a1.pdf [file d1cp05573a1.pdf]

## Supplementary Material

### On the effects of induced polarizability at the water-graphene interface via classical charge-on-spring models

Yerko Escalona,<sup>1</sup> Nicolas Espinoza,<sup>2,3</sup> Mateo Barria-Urenda,<sup>2,3</sup> Chris Oostenbrink,<sup>1</sup> and  
Jose Antonio Garate<sup>2,3, a)</sup>

<sup>1)</sup>*Institute for Molecular Modeling and Simulation, University of Natural Resources  
and Life Sciences, 1190 Vienna, Austria*

<sup>2)</sup>*Centro Interdisciplinario de Neurociencia de Valparaíso (CINV),  
Universidad de Valparaíso, Valparaíso, Chile*

<sup>3)</sup>*Millennium Nucleus in NanoBioPhysics (NNBP), Universidad de Valparaíso,  
Pasaje Harrington 287, Valparaíso, Chile.*

(Dated: 17 January 2022)

---

<sup>a)</sup> Author to whom correspondence should be addressed.

email: jose.garate@uv.cl

TABLE S1. Polarizability and charge properties of the models employed

|                               | $\delta$ | $\alpha$ ( $10^{-3}\text{nm}^3$ ) | $Q_{\text{pol}}$ |
|-------------------------------|----------|-----------------------------------|------------------|
| $\text{O}_{\text{COS/G2-D2}}$ | -1.0530  | 1.1                               | $\pm 8$          |
| $\text{H}_{\text{COS/G2-D2}}$ | 0.5265   | 0                                 | 0                |
| $\text{O}_{\text{SPC}}$       | -0.8200  | 0                                 | 0                |
| $\text{H}_{\text{SPC}}$       | 0.4100   | 0                                 | 0                |
| $\text{C}_{\text{CCCP}}$      | 0        | 1.1                               | $\pm 8$          |
| $\text{C}_{\text{CCC}}$       | 0        | 0                                 | 0                |

TABLE S2. Lennard-Jones potential parameters

|                              | $\varepsilon$ ( $\text{kJ/mol}$ ) | $\sigma$ ( $\text{nm}$ ) |
|------------------------------|-----------------------------------|--------------------------|
| $\text{C-O}_{\text{SPC}}$    | 0.425                             | 0.337                    |
| $\text{C-O}_{\text{COS/G2}}$ | 0.460                             | 0.338                    |
| $\text{C-O}_{\text{COS/D2}}$ | 0.474                             | 0.337                    |

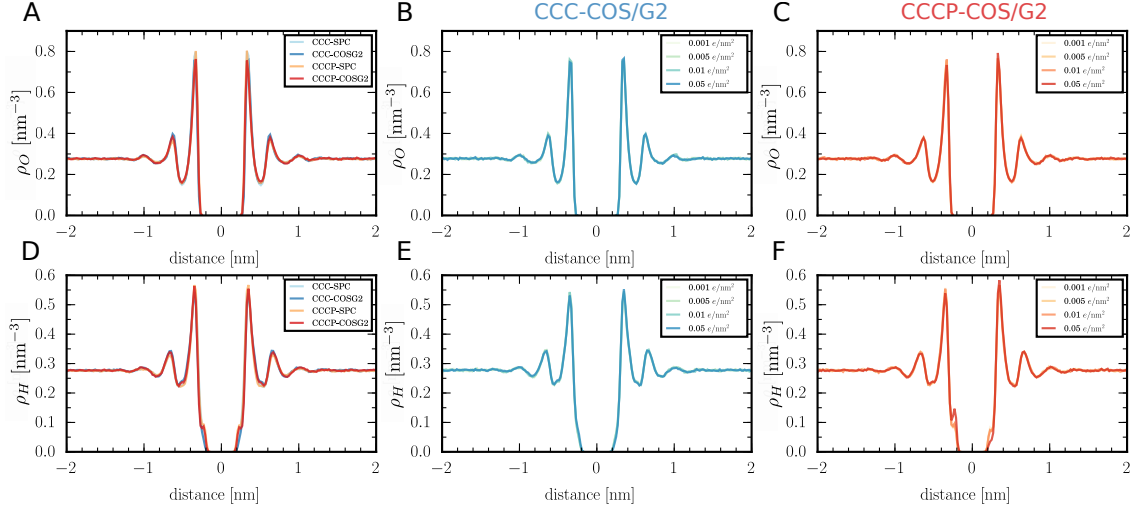

FIG. S1. Water oxygen ( $\rho_O$ ) and hydrogen ( $\rho_H$ ) density for hybrid systems. In A and D,  $\rho_O$  and  $\rho_H$  profiles, respectively for the CCC-SPC, CCC-COSG2, CCCP-SPC and CCCP-COSG2 systems. B and E present  $\rho_O$  and  $\rho_H$  under the effects of external electric fields for the CCC-COS/G2. C and F present  $\rho_O$  and  $\rho_H$  under the effects of external electric fields for the CCCP-COS/G2.

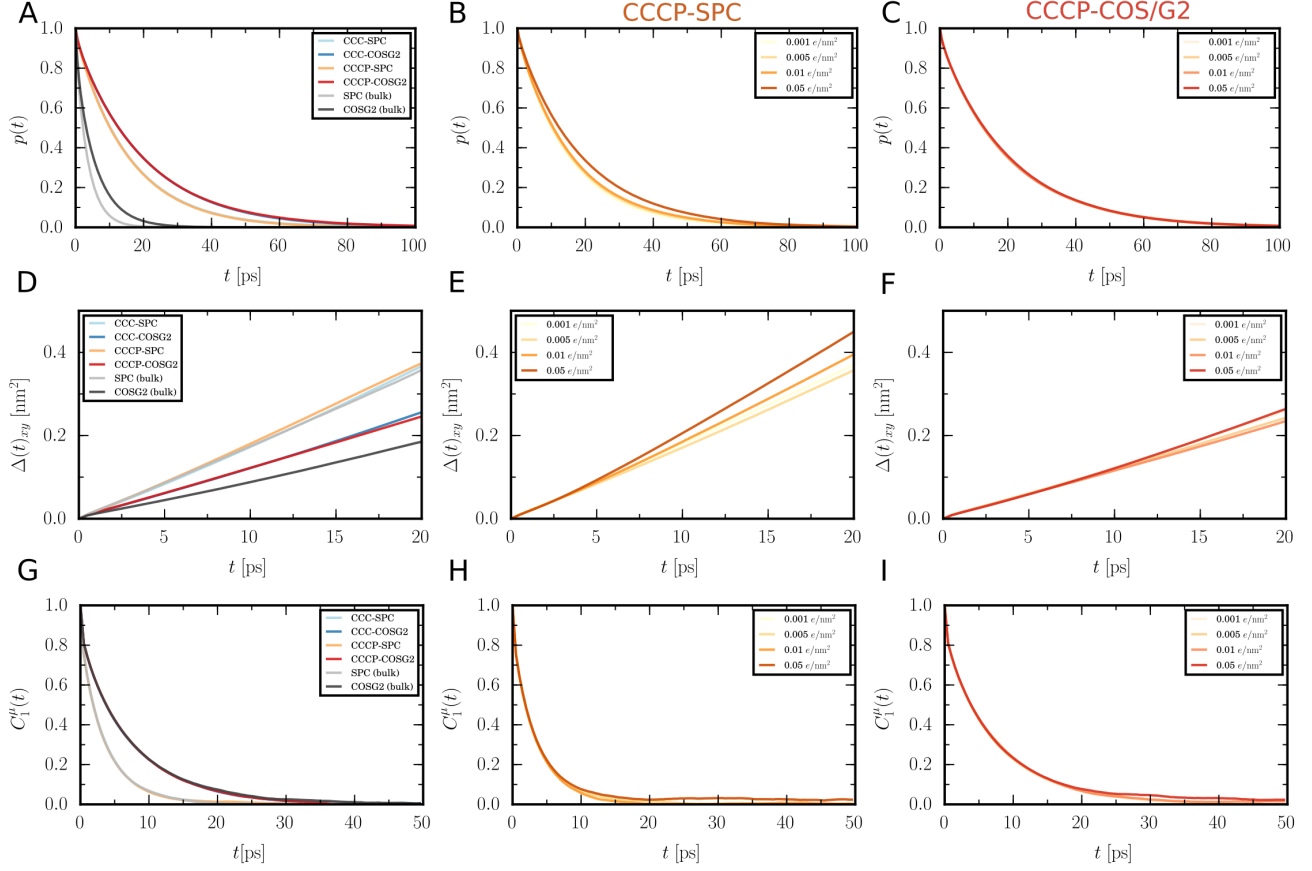

FIG. S2. Water dynamics of interfaced waters. **A** shows the survival probability of waters in the interface with graphene for the systems: CCC-SPC (light blue line), CCC-COSG2 (blue line), CCCP-SPC (light red) and CCCP-COSG2 (red line); and for the SPC (grey line) and COS/G2 (black line) waters in the bulk, which correspond to the outer layer of water with respect to the graphene. **B** and **C** correspond to the survival probability of waters in the interface with graphene at different electric field strength condition (0.001, 0.005, 0.01 and 0.05  $e/\text{nm}^2$ ) for the systems CCCP-SPC and CCCP-COSG2, respectively. **D** shows the mean squared displacement of interfacial water in the  $xy$  axis for the different systems and the bulk. **E** and **F** shows the same but with different electric field strengths for the CCCP-SPC and CCCP-COSG2 systems, respectively. **G** shows the rotational relaxation curve of the dipole vector in the interfaced waters with graphene for the different systems and for waters in the bulk region. **H** and **I** shows the same in different electric field strength condition for the CCCP-SPC and CCCP-COSG2 systems, respectively.

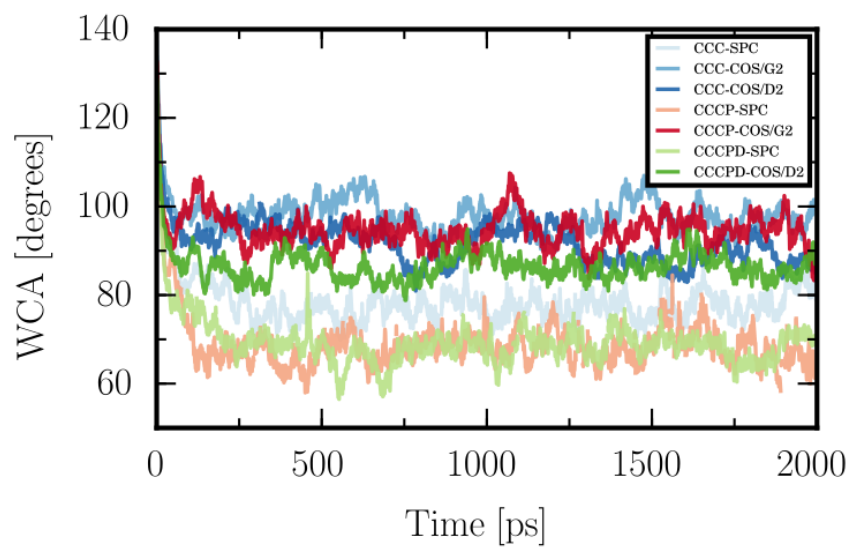

FIG. S3. Time series of Water contact angle (WCA) for combinations of polarizable and fixed charged models: CCC-SPC (light blue), CCC-COS/G2 (blue), CCC-COS/D2 (dark blue), CCCP-SPC (light red), CCCP-COS/G2 (red), CCCPD-SPC (light green) and CCCPD-COS/D2 (green)

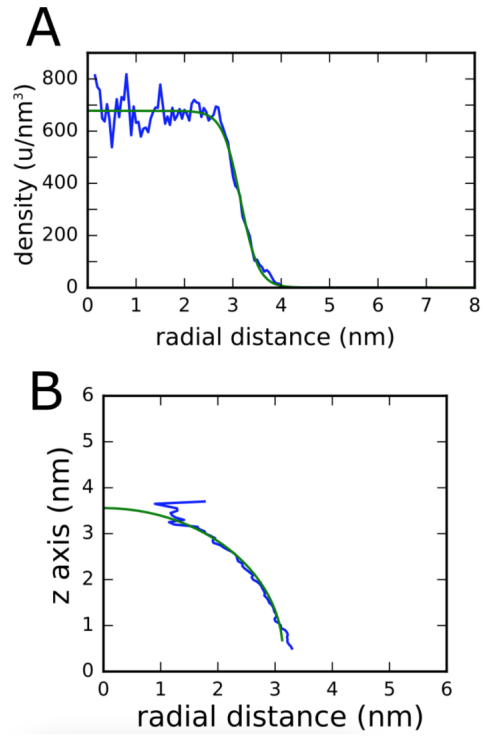

FIG. S4. Representative plots employed to compute WCA. In A, number densities as function of the radial distance along the x-y plane, for the first bin along the z axis. In B, radial distance along the x-y plane as function of the z axis. In blue and green computed data and non-linear fits, respectively.

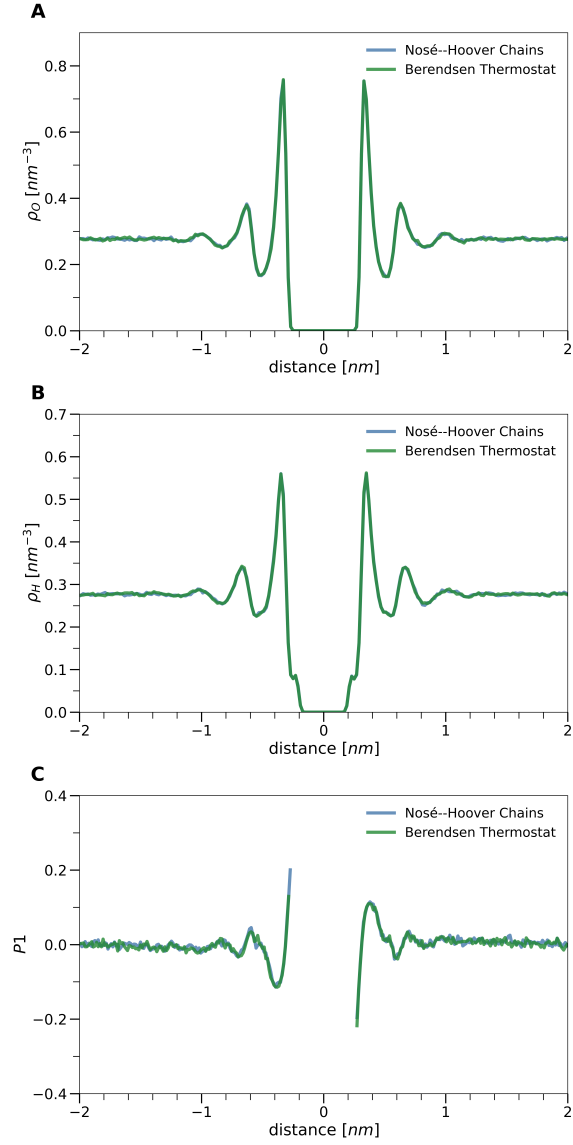

FIG. S5. Water oxygen ( $\rho_O$ ) and hydrogen ( $\rho_H$ ) density and dipolar orientation (P1) profiles along the graphene normal for the CCCP-COSG2 system employing different thermostats. In A, B and C,  $\rho_O$ ,  $\rho_H$  and P1 profiles, respectively.

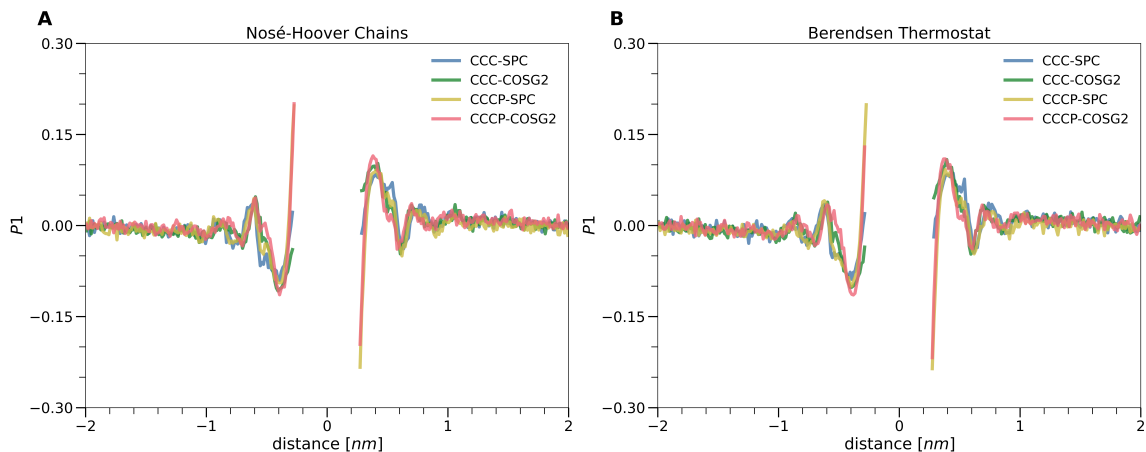

FIG. S6. Water dipolar alignment along the graphene normal for simulated systems; A,  $P1$  values employing the Nosé-Hoover thermostat; B,  $P1$  values employing the Berendsen thermostat.

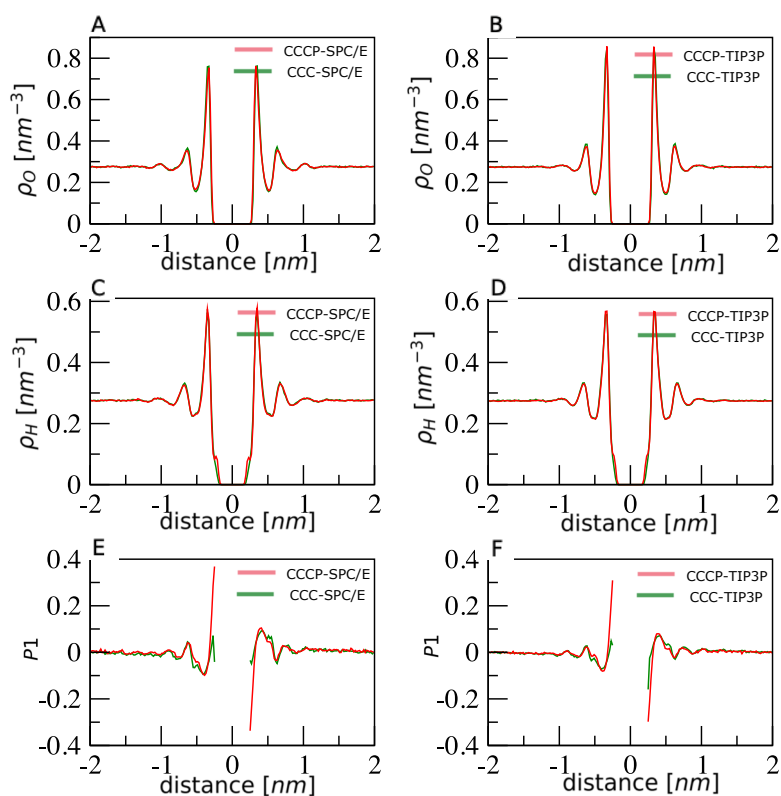

FIG. S7. Water oxygen ( $\rho_O$ ) and hydrogen ( $\rho_H$ ) density and dipolar orientation ( $P1$ ) profiles along the graphene normal for the CCC-SPC/E, CCCP-SCP/E, CCC-TIP3P and CCCP-TIP3P systems. In A,C and E,  $\rho_O$ ,  $\rho_H$  and  $P1$  profiles for the SCP/E model, respectively. In B, D and F,  $\rho_O$ ,  $\rho_H$  and  $P1$  profiles for the TIP3P model, respectively.
